# Supplementary material
Source: PubMed Central journal article supplement (PMC3749501)
Supplement: ismej201362x1.pdf [file ismej201362x1.pdf]

**TABLE S1** Primers used in this study**Mutagenesis**

|           |                                                    |
|-----------|----------------------------------------------------|
| SO2364-5O | GGGGACAAGTTTGTACAAAAAAGCAGGCTACCCCCATAAACATATCTCG  |
| SO2364-5I | CCAATAGGTGCTCACGTCATGAGCCGCAATTAAAACAC             |
| SO2364-3I | ATGACGTGAGCACCTATTGGCCTTTCTACTTTGTACGTTTCC         |
| SO2364-3O | GGGGACCACTTTGTACAAGAAAGCTGGGTAGTCCTTCGATTCCTTGC    |
| SO3285-5O | GGGGACAAGTTTGTACAAAAAAGCAGGCTAAGAGCAAATTAAAGCTGCT  |
| SO3285-5I | ACGATGCACCTTCGCTAAATGATAATCGGTAATAACGCC            |
| SO3285-3I | ATTTAGCGAAGGTGCATCGTGTTTGGCCGCTTAAGCC              |
| SO3285-3O | GGGGACCACTTTGTACAAGAAAGCTGGGTCAGCGAATGAGTTATCTTCCC |
| SO4607-5O | GGGGACAAGTTTGTACAAAAAAGCAGGCTAGCACTTGCAGGTAGTGCTA  |
| SO4607-5I | AGCACGAGGTAGCCGCAAATTGTAAAGGCTGGCATTACC            |
| SO4607-3I | ATTTGCGGCTACCTCGTGCTGGTGATTAAGTGCATTCC             |
| SO4607-3O | GGGGACCACTTTGTACAAGAAAGCTGGGTTATCGCCTGACCCACAAT    |

**Complementation**

|                |                                |
|----------------|--------------------------------|
| SO2364/2363-CF | CCCCCGGGTCTAAGGAGCAGATTGATC    |
| SO2364/2363-CR | GGAATTCCTTATTTGAGTGCGTGAC      |
| SO2361-CF      | CCAATGCATAGTAGCTTCTGGAGTATTTGG |
| SO2361-CR      | GGAATTCCTCGAGGTTATCGAGGCC      |
| SO3285/3286-CF | CCCCCGGGATGGTTACGTGGTTAATTTG   |
| SO3285/3286-CR | GACTAGTGCTCCTTAGTTCTAATAGAGTGA |
| SO4606-CF      | CCCCCGGGGTGAAGCAATGGTTGTATTG   |
| SO4606-CR      | GGAATTCCTACTTTCCATGGCGTGCGATAT |

**Promoter activity**

|           |                                              |
|-----------|----------------------------------------------|
| SO4606-5P | GGAATTCGCCTTGAAAGCCGCCTC                     |
| SO4606-3P | CGGGATCCGTAATCATGGTCATAAGACTTCTCCTCTGCCAAT   |
| SO3286-5P | GGAATTCCTGAATCAAAGCGGGTGG                    |
| SO3286-3P | CGGGATCCGTAATCATGGTCATCGGTGACTCCTTACGTGGTGC  |
| SO2364-5P | GGAATTCGAAGCAGTGAGATTCATTGTA                 |
| SO2364-3P | CGGGATCCGTAATCATGGTCATAATGCTTCCACTGCTTATTACT |

---

**qRT-PCR**

|             |                       |
|-------------|-----------------------|
| qRT-2364-F  | CCGTTTCCTGTTAGCTTGTTT |
| qRT-2364-R  | AATAGGAAACCTACAGCATT  |
| qRT-3285-F  | CCAGTGGGTTTCGATTACCG  |
| qRT-3285 -R | TGATCAGCGGTGGCACAAAG  |
| qRT-4606-F  | GAGCAAAAACAAGCCGCAGA  |
| qRT-4606-R  | AAACTTGCTCTCCCTGCGTC  |

---
